# Supplementary material for: Dependence of contextual modulation in macaque V1 on interlaminar signal flow
Source: eLife. 2026 Jan 6;13:RP103255. doi: 10.7554/eLife.103255 (PMC12774416; doi:10.7554/eLife.103255)
Supplement: Supplementary file 3. [file elife-103255-supp3.docx]

**Supplementary File 3. GLMs for dependence of border ownership and local contrast on CCG asymmetry.**

| GLM | Border ownership (Bown) | | | | Local contrast (LC) | | | |
| --- | --- | --- | --- | --- | --- | --- | --- | --- |
| Estimate | SE | tStat | p | Estimate | SE | tStat | p |
| Intercept | 0.166 | 0.008 | 21.379 | 0 | 0.362 | 0.010 | 35.352 | 0 |
| **CCG asymmetry** | **-0.158** | 0.032 | -4.880 | **1.1*10-6** | **-0.044** | 0.043 | -1.037 | **0.300** |
| 4C-5/6  *rel.4C-2/3* | 0.014 | 0.007 | 1.948 | 0.05 | -0.117 | 0.009 | -12.606 | 3.5*10-35 |
| 4A/B-2/3 *rel.4C-2/3* | 2.5*10-5 | 0.006 | 0.004 | 0.99 | -0.016 | 0.008 | -1.877 | 0.061 |
| 4A/B-5/6 *rel.4C-2/3* | 0.009 | 0.007 | 1.351 | 0.18 | -0.136 | 0.009 | -15.093 | 0 |
| *pen2rel.pen1* | -0.009 | 0.007 | -1.219 | 0.22 | 0.010 | 0.010 | 0.980 | 0.327 |
| *pen3 rel.pen1* | 0.038 | 0.009 | 4.435 | 9.7*10-6 | 0.035 | 0.011 | 3.082 | 0.002 |
| *pen4 rel.pen1* | 0.049 | 0.010 | 5.147 | 2.9*10-7 | -0.088 | 0.013 | -6.910 | 6.4*10-12 |

Number of observations: 2118; Error degrees of freedom: 2110

GLM(Bown): R2=0.11; F-statistic vs. constant model: 37.2, p-value=0.

GLM(LC): R2=0.27; F-statistic vs. constant model: 109, p-value=0.
